# Supplementary material for: Assigning a structural motif using spontaneous molecular dipole orientation in thin films
Source: Royal Society of Chemistry journal article supplement (doi:10.1039/c8cp06010j), 2018-01-01

## **Assigning a Structural Motif using Spontaneous Dipole Orientation in Thin Films**

M. Roman, A. Dunn<sup>(a)</sup>, S. Taj, Z. G. Keolopile<sup>(b)</sup>, A. Rosu-Finsen<sup>(c)</sup>,

M. Gutowski, and M. R. S. McCoustra,

*Institute of Chemical Sciences, Heriot-Watt University, EDINBURGH, EH14 4AS, UK*

A. M. Cassidy and D. Field,

*Department of Physics and Astronomy, University of Aarhus, AARHUS, DK-8000, Denmark*

(a) Current Address: Q2 Solutions, Alba Campus, Rosebank, LIVINGSTON, West Lothian, EH54 7EG, UK;

(b) Department of Physics, University of Botswana, Private Bag 0022, GABORONE, Botswana;

(c) Current Address: Department of Chemistry, University College London, LONDON, WC1H 0AJ, UK.

Table S1. The CCSD/ATZ geometries of the *cis*-, *trans*-MF and the transition state structures.

| <b><i>cis</i>-MF</b> |           |           |           |
|----------------------|-----------|-----------|-----------|
| C                    | -0.929000 | -0.082997 | 0.000000  |
| O                    | 0.000951  | 0.874271  | 0.000000  |
| O                    | -0.717913 | -1.264024 | 0.000000  |
| C                    | 1.353536  | 0.393117  | 0.000000  |
| H                    | -1.922975 | 0.372000  | 0.000000  |
| H                    | 1.978242  | 1.280400  | 0.000000  |
| H                    | 1.538450  | -0.208706 | 0.887518  |
| H                    | 1.538450  | -0.208706 | -0.887518 |

| <b><i>trans</i>-MF</b> |           |           |           |
|------------------------|-----------|-----------|-----------|
| C                      | 0.056643  | 0.000000  | -0.013646 |
| O                      | -0.025727 | 0.000000  | 1.325694  |
| O                      | 1.096774  | 0.000000  | -0.598417 |
| C                      | -1.354346 | 0.000000  | 1.854421  |
| H                      | -0.924197 | 0.000000  | -0.513131 |
| H                      | -1.248248 | 0.000000  | 2.934380  |
| H                      | -1.896950 | 0.893158  | 1.542933  |
| H                      | -1.896950 | -0.893158 | 1.542933  |

| <b>TS-MF</b> |           |           |           |
|--------------|-----------|-----------|-----------|
| C            | 0.003861  | -0.000182 | 0.008209  |
| O            | 0.015538  | 0.012450  | 1.437947  |
| O            | 1.272161  | 0.002919  | 1.964765  |
| C            | 1.889690  | 0.987458  | 2.231775  |
| H            | 1.648170  | -1.012162 | 2.149353  |
| H            | -1.039376 | -0.033213 | -0.289944 |
| H            | 0.473788  | 0.903011  | -0.382914 |
| H            | 0.519810  | -0.883281 | -0.377950 |

Table S2. Harmonic (H) vibrational constants, anharmonic (AH) corrections to the 0-1 transition, and anharmonic 0-1 transitions (cm<sup>-1</sup>) followed by the IR intensities (km/mol) of *cis*-MF.  $\delta$ MP2(AH) stands for an anharmonic correction obtained at the MP2 level. All results obtained with the ATZ basis set.

| Mode | Vibrational Constant |        |         |                  |                              | IR Intensity |
|------|----------------------|--------|---------|------------------|------------------------------|--------------|
|      | CCSD(H)              | MP2(H) | MP2(AH) | $\delta$ MP2(AH) | CCSD(H)+<br>$\delta$ MP2(AH) | CCSD(H)      |
| 1    | 155.4                | 154.5  | 135.5   | -19.0            | <b>136.4</b>                 | 0.164        |
| 2    | 312.6                | 307.9  | 315.2   | 7.3              | <b>319.9</b>                 | 14.550       |
| 3    | 340.7                | 346.4  | 335.7   | -10.7            | <b>330.0</b>                 | 27.608       |
| 4    | 786.7                | 771.6  | 761.6   | -10.0            | <b>776.8</b>                 | 7.797        |
| 5    | 970.0                | 953.2  | 925.9   | -27.3            | <b>942.7</b>                 | 27.366       |
| 6    | 1069.7               | 1046.4 | 1024.9  | -21.6            | <b>1048.1</b>                | 0.008        |
| 7    | 1196.7               | 1187.1 | 1162.3  | -24.8            | <b>1171.9</b>                | 1.931        |
| 8    | 1213.3               | 1192.9 | 1161.5  | -31.4            | <b>1181.9</b>                | 62.976       |
| 9    | 1269.4               | 1246.7 | 1207.1  | -39.6            | <b>1229.8</b>                | 279.542      |
| 10   | 1420.0               | 1399.4 | 1370.7  | -28.8            | <b>1391.2</b>                | 1.446        |
| 11   | 1492.8               | 1478.3 | 1442.4  | -35.9            | <b>1456.8</b>                | 3.677        |
| 12   | 1514.6               | 1511.9 | 1468.9  | -42.9            | <b>1471.7</b>                | 8.616        |
| 13   | 1523.3               | 1519.2 | 1473.7  | -45.5            | <b>1477.8</b>                | 10.931       |
| 14   | 1827.0               | 1769.5 | 1738.5  | -31.0            | <b>1796.0</b>                | 316.746      |
| 15   | 3081.1               | 3096.6 | 3001.9  | -94.7            | <b>2986.4</b>                | 25.222       |
| 16   | 3107.5               | 3111.4 | 2963.7  | -147.7           | <b>2959.8</b>                | 36.917       |
| 17   | 3160.8               | 3189.7 | 3051.7  | -138.1           | <b>3022.7</b>                | 15.504       |
| 18   | 3191.1               | 3224.6 | 3086.2  | -138.4           | <b>3052.6</b>                | 11.079       |

Table S3. Harmonic (H) vibrational constants, anharmonic (AH) corrections to the 0-1 transition, and anharmonic 0-1 transitions ( $\text{cm}^{-1}$ ) followed by the IR intensities ( $\text{km/mol}$ ) of *trans*-MF.  $\delta\text{MP2(AH)}$  stands for an anharmonic correction obtained at the MP2 level. All results obtained with the ATZ basis set.

| Mode | Vibrational Constant |        |         |                        |                                    | IR Intensity |
|------|----------------------|--------|---------|------------------------|------------------------------------|--------------|
|      | CCSD(H)              | MP2(H) | MP2(AH) | $\delta\text{MP2(AH)}$ | CCSD(H)+<br>$\delta\text{MP2(AH)}$ | CCSD(H)      |
| 1    | 40.1                 | -50.7  | -71.5   | -20.9                  | <b>19.2</b>                        | 7.414        |
| 2    | 174.3                | 179.2  | 175.1   | -4.1                   | <b>170.2</b>                       | 1.969        |
| 3    | 352.8                | 348.0  | 360.6   | 12.6                   | <b>365.4</b>                       | 141.963      |
| 4    | 647.9                | 635.0  | 627.5   | -7.5                   | <b>640.4</b>                       | 1.388        |
| 5    | 1059.4               | 1036.9 | 1017.1  | -19.9                  | <b>1039.5</b>                      | 0.933        |
| 6    | 1065.2               | 1043.4 | 1019.8  | -23.6                  | <b>1041.6</b>                      | 234.124      |
| 7    | 1162.8               | 1142.1 | 1112.6  | -29.4                  | <b>1133.4</b>                      | 1.042        |
| 8    | 1193.6               | 1183.5 | 1166.8  | -16.7                  | <b>1176.9</b>                      | 5.985        |
| 9    | 1278.2               | 1256.1 | 1230.1  | -26.0                  | <b>1252.2</b>                      | 0.360        |
| 10   | 1437.5               | 1415.6 | 1383.3  | -32.3                  | <b>1405.2</b>                      | 20.454       |
| 11   | 1503.2               | 1488.0 | 1455.2  | -32.8                  | <b>1470.4</b>                      | 7.454        |
| 12   | 1525.6               | 1522.9 | 1478.6  | -44.2                  | <b>1481.4</b>                      | 405.418      |
| 13   | 1528.2               | 1525.9 | 1483.4  | -42.5                  | <b>1485.7</b>                      | 0.174        |
| 14   | 1869.1               | 1807.1 | 1778.5  | -28.5                  | <b>1840.6</b>                      | 38.966       |
| 15   | 3016.5               | 3013.4 | 2889.5  | -124.0                 | <b>2892.5</b>                      | 40.889       |
| 16   | 3060.0               | 3079.3 | 2989.0  | -90.2                  | <b>2969.8</b>                      | 23.006       |
| 17   | 3132.2               | 3168.1 | 3031.3  | -136.8                 | <b>2995.4</b>                      | 55.745       |
| 18   | 3184.6               | 3216.3 | 3074.1  | -142.2                 | <b>3042.4</b>                      | 8.864        |

Table S4. Harmonic (H) vibrational constants, anharmonic (AH) corrections to the 0-1 transition, and anharmonic 0-1 transitions ( $\text{cm}^{-1}$ ) followed by the IR intensities ( $\text{km mol}^{-1}$ ) of *TS*-MF.  $\delta\text{MP2(AH)}$  stands for an anharmonic correction obtained at the MP2 level. All results obtained with the ATZ basis set.

| Mode | Vibrational Constant |        |         |                        |                                    | IR Int  |
|------|----------------------|--------|---------|------------------------|------------------------------------|---------|
|      | CCSD(H)              | MP2(H) | MP2(AH) | $\delta\text{MP2(AH)}$ | CCSD(H)+<br>$\delta\text{MP2(AH)}$ |         |
| 1    | -232.2               | -242.4 | -243.4  | -1.1                   | <b>-233.2</b>                      | 14.480  |
| 2    | 170.2                | 184.0  | 173.0   | -10.9                  | <b>159.3</b>                       | 0.521   |
| 3    | 303.8                | 290.1  | 289.3   | -0.8                   | <b>303.0</b>                       | 5.064   |
| 4    | 675.4                | 661.6  | 651.9   | -9.7                   | <b>665.7</b>                       | 20.398  |
| 5    | 992.5                | 974.8  | 952.3   | -22.5                  | <b>970.0</b>                       | 44.521  |
| 6    | 1064.5               | 1045.5 | 1026.0  | -19.5                  | <b>1045.0</b>                      | 36.210  |
| 7    | 1171.6               | 1146.4 | 1110.7  | -35.7                  | <b>1135.9</b>                      | 208.809 |
| 8    | 1188.6               | 1179.1 | 1153.1  | -26.0                  | <b>1162.6</b>                      | 11.495  |
| 9    | 1245.9               | 1226.2 | 1196.2  | -29.9                  | <b>1216.0</b>                      | 120.412 |
| 10   | 1410.4               | 1391.0 | 1359.3  | -31.8                  | <b>1378.7</b>                      | 2.892   |
| 11   | 1497.8               | 1485.3 | 1450.5  | -34.8                  | <b>1463.0</b>                      | 1.926   |
| 12   | 1520.9               | 1518.7 | 1474.5  | -44.2                  | <b>1476.7</b>                      | 8.031   |
| 13   | 1531.8               | 1529.6 | 1487.2  | -42.4                  | <b>1489.4</b>                      | 8.461   |
| 14   | 1848.5               | 1780.7 | 1748.6  | -32.1                  | <b>1816.4</b>                      | 286.013 |
| 15   | 3041.7               | 3044.9 | 2900.0  | -144.9                 | <b>2896.8</b>                      | 39.191  |
| 16   | 3048.9               | 3058.2 | 2989.8  | -68.4                  | <b>2980.6</b>                      | 51.320  |
| 17   | 3116.5               | 3143.4 | 3010.2  | -133.3                 | <b>2983.3</b>                      | 24.463  |
| 18   | 3178.2               | 3205.6 | 3068.8  | -136.9                 | <b>3041.3</b>                      | 11.741  |

Table S5. Harmonic MP2/ADZ frequencies in D1-D3 determined on the counterpoise-corrected potential energy surface.

|    | Frequency / cm <sup>-1</sup> |                                |                              | <i>cis</i> -MF              |
|----|------------------------------|--------------------------------|------------------------------|-----------------------------|
|    | D1                           | D2                             | D3                           |                             |
| 1  | 17.3303                      | 19.0039                        | 16.7124                      |                             |
| 2  | 26.4705                      | 30.538                         | 36.8971                      |                             |
| 3  | 42.5924                      | 39.0231                        | 49.9524                      |                             |
| 4  | 47.6156                      | 58.0936                        | 54.0311                      |                             |
| 5  | 57.7024                      | 75.6491                        | 64.8637                      |                             |
| 6  | 70.0688                      | 83.4757                        | 78.1731                      |                             |
| 7  | 162.4087                     | 166.1605                       | 165.7097                     | 163.968                     |
| 8  | 187.3773                     | 192.491                        | 166.2273                     |                             |
| 9  | 305.1273                     | 304.7949                       | 311.9271                     | 305.348                     |
| 10 | 305.2332                     | 311.9556                       | 312.1476                     |                             |
| 11 | 344.4287                     | 346.9061                       | 350.5635                     | 342.917                     |
| 12 | 345.1247                     | 352.9687                       | 354.996                      |                             |
| 13 | 760.2241                     | 760.8088                       | 759.7379                     | 760.597                     |
| 14 | 762.6378                     | 763.8339                       | 764.0251                     |                             |
| 15 | 926.388                      | 926.0598                       | 935.4404                     | 935.337                     |
| 16 | 927.075                      | 936.8103                       | 937.1531                     |                             |
| 17 | 1032.8117                    | 1033.3412                      | 1051.2394                    | 1029.946                    |
| 18 | 1033.0014                    | 1051.8451                      | 1052.4327                    |                             |
| 19 | 1155.4815                    | 1170.7097                      | 1169.4609                    | 1171.054                    |
| 20 | 1157.5565                    | 1172.5636                      | 1170.793                     |                             |
| 21 | 1171.9672                    | 1175.2556                      | 1170.8236                    | 1173.481                    |
| 22 | 1176.1757                    | 1180.652                       | 1177.1273                    |                             |
| 23 | 1228.4044                    | 1222.2935                      | 1217.6592                    | 1222.217                    |
| 24 | 1232.2351                    | 1237.2636                      | 1229.5588                    |                             |
| 25 | 1385.6053                    | 1386.3478                      | 1384.8582                    | 1382.523                    |
| 26 | 1385.6997                    | 1391.4834                      | 1388.2572                    |                             |
| 27 | 1442.1982                    | 1449.3153                      | 1449.5398                    | 1450.475                    |
| 28 | 1442.2528                    | 1455.6981                      | 1449.5713                    |                             |
| 29 | 1471.3311                    | 1480.4056                      | 1480.493                     | 1480.569                    |
| 30 | 1478.939                     | 1485.615                       | 1480.5013                    |                             |
| 31 | 1483.0065                    | 1487.4534                      | 1487.3872                    | 1487.800                    |
| 32 | 1483.576                     | 1498.1259                      | 1487.5147                    |                             |
| 33 | <b>1733.1417<sup>b</sup></b> | <b>1727.1686<sup>b,d</sup></b> | <b>1722.0303<sup>b</sup></b> | <b>1743.977<sup>a</sup></b> |
| 34 | <b>1743.6041<sup>c</sup></b> | <b>1741.5904<sup>c,e</sup></b> | <b>1735.4076<sup>c</sup></b> |                             |
| 35 | 3105.9356                    | 3091.6806                      | 3092.7908                    | 3093.263                    |
| 36 | 3106.0578                    | 3092.3399                      | 3092.8931                    |                             |
| 37 | 3122.6878                    | 3124.5049                      | 3152.9848                    | 3125.711                    |
| 38 | 3123.0755                    | 3156.2131                      | 3153.5715                    |                             |
| 39 | 3211.7238                    | 3191.3952                      | 3192.2235                    | 3192.902                    |
| 40 | 3212.8546                    | 3197.7573                      | 3192.247                     |                             |
| 41 | 3236.6277                    | 3227.6137                      | 3228.092                     | 3228.845                    |
| 42 | 3237.3012                    | 3229.7349                      | 3228.1109                    |                             |

<sup>a</sup>This mode of *cis*-MF is dominated by the C=O stretch; <sup>b</sup>symmetric; <sup>c</sup>antisymmetric; <sup>d</sup>dominated by monomer 1; <sup>e</sup>dominated by monomer 2

Table S6. The energies of D2 and D3 with respect to D1 at various levels of theory (all energies in meV).

|                         | <b>D2</b> | <b>D3</b> |
|-------------------------|-----------|-----------|
| $E_{HF}^{\infty}$       | -33.44    | -51.74    |
| $E_{MP2}^{\infty}$      | 37.02     | 63.18     |
| $\Delta E_{CCSD}$       | 7.93      | 14.58     |
| $\Delta E_T$            | -3.05     | -5.24     |
| $E_{total}$             | 8.46      | 20.79     |
| $E_0^{vib}$             | 1.93      | -7.13     |
| $E_{total} + E_0^{vib}$ | 10.40     | 13.66     |

Table S7. Structure of one-body deformation energy for two cis monomers in D1-D3. (All energies in meV).

|                    | <b>1@D1</b> | <b>2@D1</b> | <b>1@D2</b> | <b>2@D2</b> | <b>1@D3</b> | <b>2@D3</b> |
|--------------------|-------------|-------------|-------------|-------------|-------------|-------------|
| $E_{HF}^{\infty}$  | 1.25        | 1.25        | 9.87        | 1.55        | 9.13        | 9.13        |
| $E_{MP2}^{\infty}$ | 0.79        | 0.79        | -5.25       | 2.37        | -4.46       | -4.46       |
| $\Delta E_{CCSD}$  | 0.54        | 0.54        | 1.16        | 0.15        | 1.00        | 1.00        |
| $\Delta E_T$       | -0.28       | -0.28       | -1.14       | -0.19       | -1.02       | -1.02       |
| $E_{total}$        | 2.30        | 2.30        | 4.64        | 3.88        | 4.65        | 4.65        |



Table S8. Structure of the two-body interaction energy between deformed monomers in the D1, D2 and D3 dimers (All energies in meV).

|                    | <b>D1</b> | <b>D2</b> | <b>D3</b> |
|--------------------|-----------|-----------|-----------|
| $E_{HF}^{\infty}$  | -80.85    | -123.20   | -148.33   |
| $E_{MP2}^{\infty}$ | -102.37   | -60.90    | -28.70    |
| $\Delta E_{CCSD}$  | -6.88     | 0.83      | 6.79      |
| $\Delta E_T$       | -8.93     | -11.21    | -12.69    |
| $E_{total}$        | -199.03   | -194.47   | -182.93   |

Figure S1. 16 low-energy structures of the MF dimer determined at the MP2/ADZ level. The relative energies in meV. The energies in parentheses obtained on the counterpoise-corrected surface.

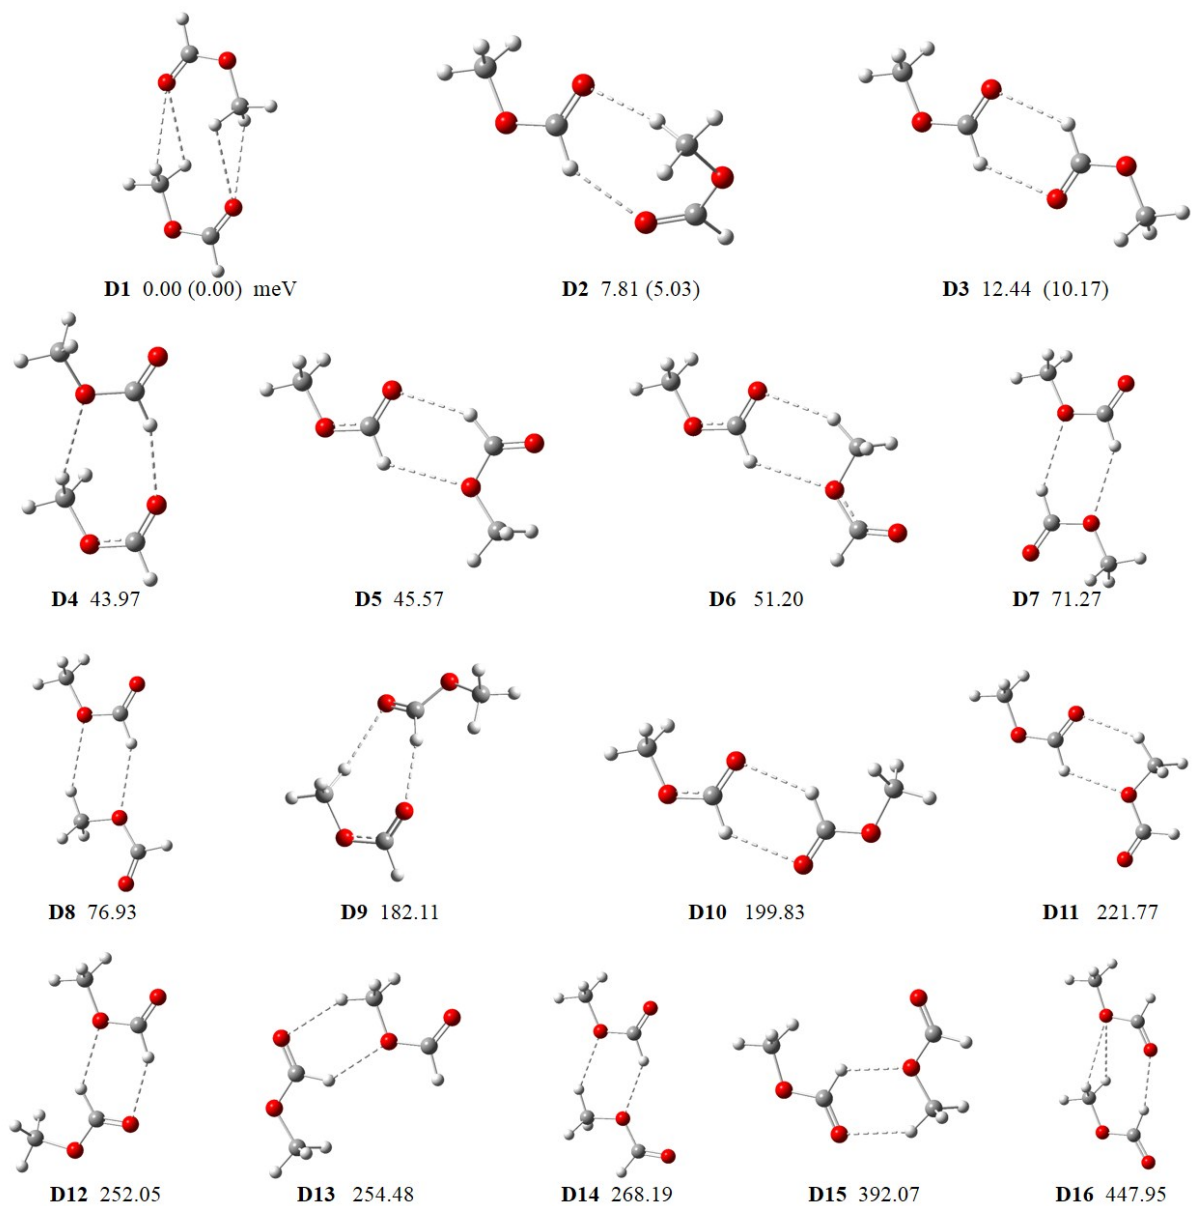

Supplement: c8cp06010j1.pdf [file c8cp06010j1.pdf]
